# Supplementary material for: CRBN Is a Negative Regulator of Bactericidal Activity and Autophagy Activation Through Inhibiting the Ubiquitination of ECSIT and BECN1
Source: PubMed Central journal article supplement (PMC6759600; doi:10.3389/fimmu.2019.02203), 2019-09-18
Supplement: Image_2.pdf [file Image_2.pdf]

**A**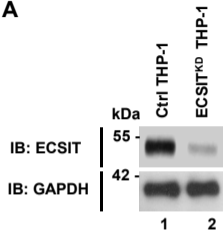**B**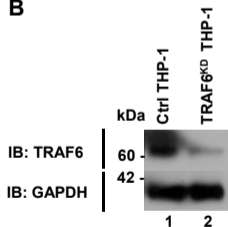**C**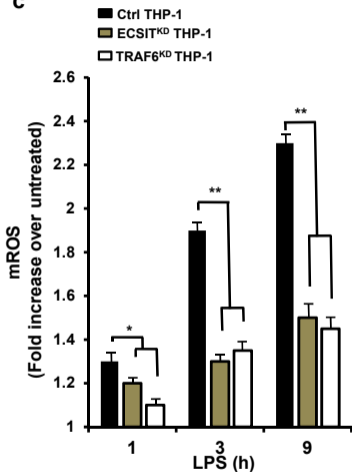

**Supplementary Figure S2**
