# Supplementary material for: CRBN Is a Negative Regulator of Bactericidal Activity and Autophagy Activation Through Inhibiting the Ubiquitination of ECSIT and BECN1
Source: PubMed Central journal article supplement (PMC6759600; doi:10.3389/fimmu.2019.02203), 2019-09-18
Supplement: Image_5.pdf [file Image_5.pdf]

**A**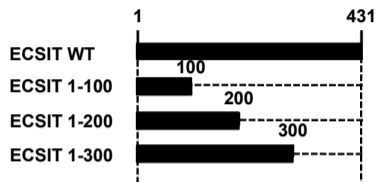**B**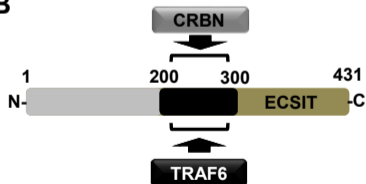**C**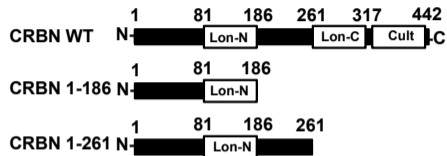**D**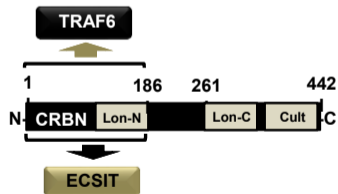*Supplementary Figure S5*
